# CALL FOR APPLICATIONS TO THE 2016 RESEARCH COLLOQUIUM FOR JUNIOR INVESTIGATORS

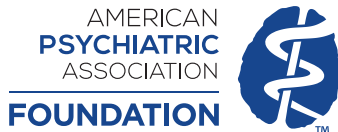

**SUNDAY,  
MAY 15, 2016  
8:00a.m.-5:00p.m.  
Omni Atlanta Hotel  
At CNN Center**

**Questions?  
colloquium@psych.org**

## ATTENTION PSYCHIATRIC RESIDENTS, FELLOWS, JUNIOR FACULTY

The Research Colloquium is accepting applications for the 2016 meeting in Atlanta, Georgia, held in conjunction with the annual meeting of the American Psychiatric Association. MDs who are senior residents, fellows, or junior faculty in psychiatry are eligible to apply.

Successful applicants will receive \$1,000 travel stipends to discuss their research in a small group setting with distinguished senior leaders in psychiatric research.

The Colloquium provides a one-day, immersive, research experience for junior investigators in the early phases of their training in psychiatry. It represents an important opportunity for mentorship, guidance, information on research career development and grantsmanship, and networking.

**Deadline: December 15, 2015**

Pre-application technical assistance is available.

Eligibility details and application packet: <http://psychiatry.org/psychiatrists/practice/research/research-colloquium>

## FREE Online Subscription to *Psychiatric Services* for APA Resident-Fellow Members (RFMs)!

American Psychiatric Association Resident-Fellow Members (RFMs) can receive a free online subscription to *Psychiatric Services*.

Simply visit [ps.psychiatryonline.org](http://ps.psychiatryonline.org) for full-text access to all of the content of APA's highly ranked, peer-reviewed monthly journal. *Psychiatric Services* focuses on service delivery in organized systems of care, evolving best practices, and federal and state policies that affect the care of people with mental illnesses.

Please visit [ps.psychiatryonline.org](http://ps.psychiatryonline.org) and log in with your American Psychiatric Association username and password.

Psychiatry residents who are not currently APA Resident-Fellow Members should consider membership in the American Psychiatric Association. The benefits provided to residents are an example of how the APA serves the needs of its members throughout their careers. The low introductory dues APA extends to RFMs are even waived for the first year. Please visit [www.psychiatry.org/joinapa](http://www.psychiatry.org/joinapa) for more information.

[ps.psychiatryonline.org](http://ps.psychiatryonline.org)

AMERICAN  
PSYCHIATRIC  
ASSOCIATION  
PUBLISHING

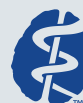

[www.appi.org](http://www.appi.org)  
Email: [appi@psych.org](mailto:appi@psych.org)  
Toll-Free: 1-800-368-5777

AH1507A

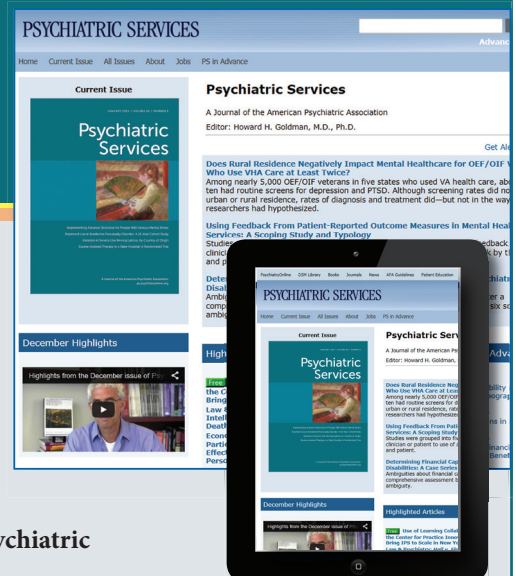

Just Published!

American Psychiatric Association Publishing

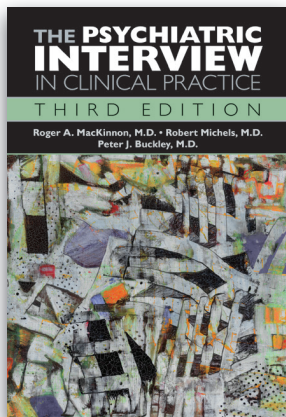

## The Psychiatric Interview in Clinical Practice, Third Edition

Roger A. MacKinnon, M.D., Robert Michels, M.D., and Peter J. Buckley, M.D.

It has been nearly a half-century since the inaugural edition of *The Psychiatric Interview in Clinical Practice*, and the book's status as a classic was again validated with the second edition a decade ago. This new, third edition maintains the book's reputation with thoroughly updated content that reflects changes brought about by the publication of DSM-5. The book presents the psychiatric interview in the context of the enormous and ongoing progress that has been made in biological and descriptive psychiatry. In addition, the book emphasizes the shift in the social

relationship between patient and clinician, recognizing that the therapeutic alliance has become the foundation of all medical treatment efforts and that patients are now better informed and seek active involvement in treatment decisions. The text reflects this growing equality and supports the clinician's efforts to nurture the relationship for optimum therapeutic outcomes. The chapter on the traumatized patient has been completely updated for this edition, and a chapter on the patient with dissociative identity disorder has been added.

*The Psychiatric Interview in Clinical Practice* will benefit mental health clinicians, both seasoned and in training, ensuring that their skills are current and their knowledge cutting-edge.

2016 • 704 pages • ISBN 978-1-61537-034-4 • Hardcover • \$79.00 • Item #37034

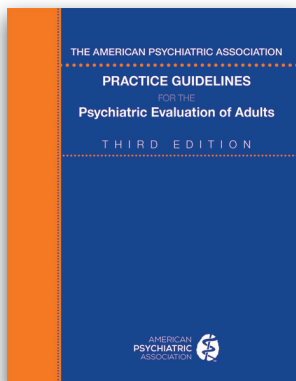

## The American Psychiatric Association Practice Guidelines for the Psychiatric Evaluation of Adults, Third Edition

American Psychiatric Association

This new edition of the practice guidelines on psychiatric evaluation for adults is the first set of the APA's guidelines developed under the new guideline development process. These guidelines address the following nine topics, in the context of an initial psychiatric evaluation: review of psychiatric symptoms, trauma history, and treatment history; substance use assessment; assessment of suicide risk; assessment for risk of aggressive behaviors;

assessment of cultural factors; assessment of medical health; quantitative assessment; involvement of the patient in treatment decision making; and documentation of the psychiatric evaluation. Each guideline recommends or suggests topics to include during an initial psychiatric evaluation. Findings from an expert opinion survey have also been taken into consideration in making recommendations or suggestions. In addition to reviewing the available evidence on psychiatry evaluation, each guideline also provides guidance to clinicians on implementing these recommendations to enhance patient care.

2016 • 170 pages • ISBN 978-0-89042-465-0 • Paperback • \$65.00 • Item #2465

2016 • 170 pages • ISBN 978-0-89042-675-3 • eBook • \$52.00 • Item #2675

Order Now

[www.appi.org](http://www.appi.org)

AMERICAN  
PSYCHIATRIC  
ASSOCIATION  
PUBLISHING

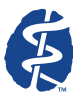

[www.appi.org](http://www.appi.org)

Email: [appi@psych.org](mailto:appi@psych.org)

Toll Free: 1-800-368-5777

20% Discount for American Psychiatric Association Members

25% Discount for APA Resident-Fellow Members

Please use Priority Code AH1553 when ordering. Find us on [f](#) and [t](#)

# The DSM-5 Collection

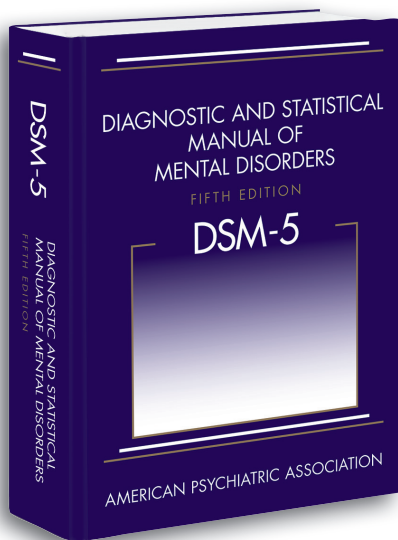

## Diagnostic and Statistical Manual of Mental Disorders, Fifth Edition (DSM-5®)

American Psychiatric Association

This new edition of *Diagnostic and Statistical Manual of Mental Disorders* (DSM-5®), used by clinicians and researchers to diagnose and classify mental disorders, is the product of more than 10 years of effort by hundreds of international experts in all aspects of mental health. Their dedication and hard work have yielded an authoritative volume that defines and classifies mental disorders in order to improve diagnosis, treatment, and research.

The criteria are concise and explicit, intended to facilitate an objective assessment of symptom presentations in a variety of clinical settings—inpatient, outpatient, partial hospital, consultation-liaison, clinical, private practice, and primary care.

- The latest findings in neuroimaging and genetics have been integrated into each disorder along with gender and cultural considerations.
- The revised organizational structure recognizes symptoms that span multiple diagnostic categories, providing new clinical insights in diagnosis.
- Both ICD-9-CM and ICD-10-CM codes are included for each disorder.

Includes everything you need to make the transition to ICD-10-CM

The *Diagnostic and Statistical Manual of Mental Disorders*, Fifth Edition, is the most comprehensive, current, and critical resource for clinical practice available to today's mental health professionals.

2013 • 991 pages • ISBN 978-0-89042-554-1 • Hardcover • \$199.00 • Item #2554  
2013 • 991 pages • ISBN 978-0-89042-555-8 • Paperback • \$149.00 • Item #2555  
2013 • 991 pages • ISBN 978-0-89042-557-2 • eBook • \$124.00 • Item #2557

**DSM-5**  
COLLECTION

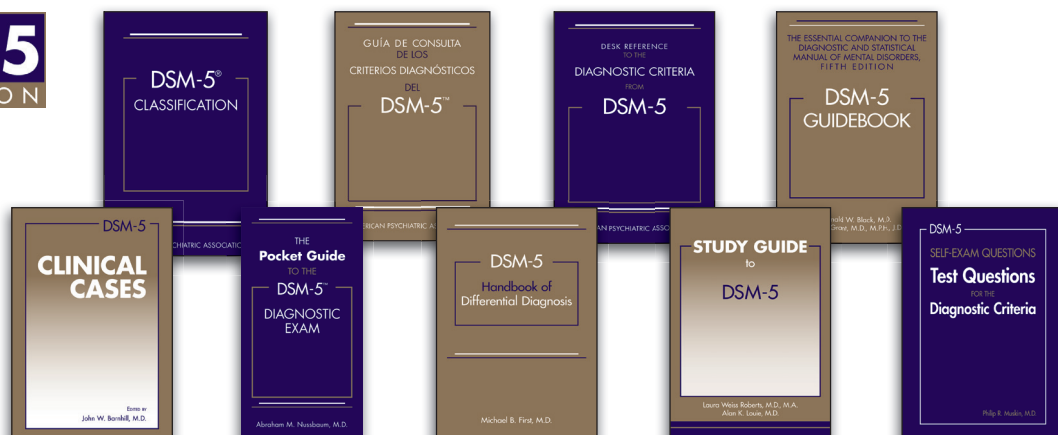

AMERICAN  
PSYCHIATRIC  
ASSOCIATION  
PUBLISHING

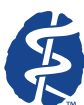

Order Online: [www.appi.org](http://www.appi.org)  
Phone: 703-907-7322  
Toll Free: 1-800-368-5777  
Email: [appi@psych.org](mailto:appi@psych.org)

20% Discount for American Psychiatric Association Members

25% Discount for APA Resident-Fellow Members AH1552A

## Subscription and Business Information

*The American Journal of Psychiatry*, ISSN 0002-953X, is published monthly by the American Psychiatric Association.

The American Psychiatric Association does not hold itself responsible for statements made in its publications by contributors or advertisers. Unless so stated, material in *The American Journal of Psychiatry* does not reflect the endorsement, official attitude, or position of the American Psychiatric Association or of the Journal's Editorial Board.

Periodicals postage paid at Arlington, VA, and additional mailing offices. POSTMASTER: Send address changes to *The American Journal of Psychiatry*, Circulation Department, American Psychiatric Association, 1000 Wilson Blvd., Suite 1825, Arlington, VA 22209-3901.

### Editorial Office

*American Journal of Psychiatry*  
American Psychiatric Association  
1000 Wilson Blvd., Suite 1825  
Arlington, VA 22209-3901  
Phone: (703) 907-7885, (703) 907-7889  
E-mail: [ajp@psych.org](mailto:ajp@psych.org)

### Customer Service

Phone: (800) 368-5777 (tollfree)  
E-mail: [appi@psych.org](mailto:appi@psych.org)

### APA Member Subscription Services

Phone: (888) 35-PSYCH (tollfree)

### Subscriptions

Per year: individual \$285.00,  
international \$429.00

Institutional subscriptions are tier priced. For institutional site license or pricing information, contact (703) 907-8538 or [institutions@psych.org](mailto:institutions@psych.org).

*Additional subscription options, including single issues and student rates*

Contact Customer Service

### Advertising

*Pharmaceutical Print and Online Advertising*  
Frank Cox, Kathleen Harrison, Tim Wolfinger  
Pharmaceutical Media, Inc.  
30 East 33rd Street  
New York, NY 10016  
Phone: (212) 904-0379  
E-mail: [twolfinger@pminy.com](mailto:twolfinger@pminy.com)

*Nonpharmaceutical and Online Sales*

Eamon Wood  
Pharmaceutical Media, Inc.  
E-mail: [ewood@pminy.com](mailto:ewood@pminy.com)  
(see address and phone above).

### Permissions and Reprints

Material published in the journals of the American Psychiatric Association and American Psychiatric Association Publishing is protected by copyright and all rights are reserved. Material may not be reproduced in any form or by any means without written permission from the copyright owner. For permission to reproduce material published by APA, please visit [http://www.appi.org/Customer\\_Service/Pages/Permissions.aspx](http://www.appi.org/Customer_Service/Pages/Permissions.aspx) for more information. Permission can also be secured through the Copyright Clearance Center ([www.copyright.com](http://www.copyright.com)).

APA does not require that permission be obtained for the photocopying of isolated articles for nonprofit classroom or library reserve use; all fees associated with such permission are waived. This consent does not extend to other kinds of copying, such as copying for general distribution, for advertising or promotional purposes, for creating new collective works, or for resale. Requests for commercial distribution should be directed to (703) 907-7875.

For bulk reprints, please contact Cecilia Stoute, (703) 907-8547; e-mail: [cstoute@psych.org](mailto:cstoute@psych.org)

Indexed in Abstracts for Social Workers, Academic Abstracts, Biological Abstracts, Chemical Abstracts, Chicago Psychoanalytic Literature Index, Cumulative Index to Nursing Literature, Excerpta Medica, Hospital Literature Index, Index Medicus, International Nursing Index, Nutrition Abstracts, Psychological Abstracts, Science Citation Index, Social Science Source, and Social Sciences Index.

Pages are produced by Dartmouth Journal Services, Waterbury, VT, and printed by Dartmouth Printing Company, Hanover, NH, on acid-free paper effective with Volume 169, Number 1, January 2012.

© 2015 American Psychiatric Association.



# JobCentral

## The Career Hub for Psychiatry

Filling an open position?

Searching for that ideal job?

Get started at [jobs.psychiatry.org](https://jobs.psychiatry.org)

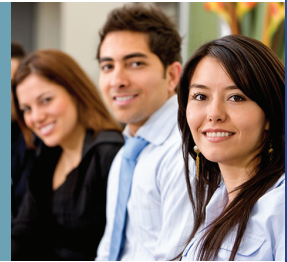

### Manage Your Career

- Search for psychiatry jobs by position, title, specialty, work setting, location, and key words to access relevant jobs.
- Create an account to save jobs, store multiple resumes and cover letters, communicate with employers through our internal messaging system, and more through an engaging interface.
- Set up multiple job alerts specifying your skills, interests and location to receive an e-mail when an employer posts a job that matches your criteria.

### Recruit for Open Positions

- Post your job in front of over 27,000 highly qualified psychiatrists.
- Cross promote your job listing in *Psychiatric News*.
- Search the anonymous resume database to find your ideal candidate.

[jobs.psychiatry.org](https://jobs.psychiatry.org)

AMERICAN  
PSYCHIATRIC  
ASSOCIATION

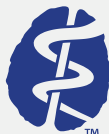

**JOBCENTRAL**  
The Career Hub for Psychiatry

More than 250 free,  
CME-accredited  
courses from UPMC  
Physician Resources.

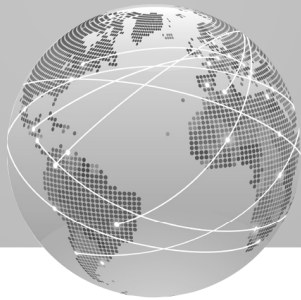

### Featured Psychiatry Courses:

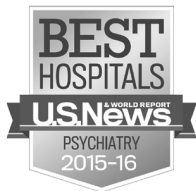

#### Anxiety Disorders

Jordan Karp, MD,  
discusses effective  
management and  
treatment of anxiety  
disorders in older adults.

#### Autism Spectrum Disorders

Benjamin J. Handen, PhD,  
reviews best practice  
interventions and  
psychopharmacological  
treatments.

#### Substance Use Disorders

Duncan B. Clark, MD, PhD,  
discusses the relationship  
between adolescent  
substance use disorders  
and brain development.

To learn more about our free CME  
courses in psychiatry, visit  
[UPMCPhysicianResources.com/Psychiatry](http://UPMCPhysicianResources.com/Psychiatry).

**UPMC** LIFE  
CHANGING  
MEDICINE

Affiliated with the University of Pittsburgh School of Medicine,  
UPMC is ranked among the nation's best hospitals  
by U.S. News & World Report.

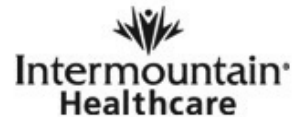

*Helping People Live the Healthiest Lives Possible.*

Psychiatrists are currently needed in  
Utah's major cities:

**Logan • Ogden • Provo  
Salt Lake City • St. George**

Employment with Intermountain Medical Group.  
Competitive salary and incentive  
recognition bonuses. Stipend available.  
Signing bonus and loan repayment available.  
Full Intermountain benefits to include defined  
pension, 401k match & CME.  
Relocation provided up to 15k.

Intermountain Healthcare is frequently  
referenced nationally as one of the leaders in  
delivering high quality/low cost health care.

Contact Intermountain Physician Recruiting,  
800-888-3134

**PhysicianRecruit@imail.org**  
**<http://physicianjobsintermountain.org>**

### Psychiatry Opportunities

**Full-Time • Newton, NJ  
Atlantic Health System**

Atlantic Health System, a five-hospital system, has been chosen by Fortune Magazine for the seventh year in a row as one of the 100 Best Companies to Work For, recognizing the rewarding working environment provided for our employees. In addition, AARP ranked us among the top ten companies in their newest list of Best Employers for Workers Over 50.

#### Inpatient Psychiatrist

Candidate will provide psychiatric evaluation, diagnosis, care and treatment of voluntary and involuntary adult patients as a member of the treatment team on a 16-bed unit. Must have M.D. or D.O. with completed residency, active NJ license to practice medicine, DEA license, NJ CDS registration, be board-certified or board-eligible in general psychiatry and be able to achieve board certification within 5 years of completion of medical training and within 2 years of hire. Experience in clinical and administrative leadership role and familiarity with NJ regulations and processes related to screening law and involuntary STCF patients is desired.

#### Outpatient Psychiatrist

Candidate will provide psychiatric evaluation, diagnosis, care and treatment of outpatient consumers. Must have M.D. or D.O. with completed residency, active NJ license to practice medicine, DEA license, NJ CDS registration, be board-certified in general psychiatry or board-eligible and must achieve board certification within 5 years of completion of medical training and within 2 years of hire. Boarding in child psychiatry is a plus but not required.

To apply, interested applicants should email their CV to **Dr. Roger Cherney, Psy.D.** at [Roger.Cherney@atlanticealth.org](mailto:Roger.Cherney@atlanticealth.org). For details and to apply, please visit our website: [jobs.atlanticealth.org](http://jobs.atlanticealth.org) (Inpatient Psychiatrist Req#00086377)(Outpatient Psychiatrist Req#00086545).

 [atlanticealth.org](http://atlanticealth.org)

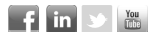

 **Atlantic  
Health System**

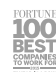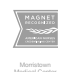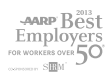

We are an Equal Opportunity Employer. All qualified applicants will receive consideration for employment without regard to race, color, religion, sex, national origin, disability or protected veteran status.

Magnet® is a registered trademark of the American Nurses Credentialing Center.

FORTUNE and FORTUNE 100 Best Companies to Work For are registered trademarks of Time Inc. and are used under license. From FORTUNE Magazine, March 15, 2015 ©2015 Time Inc. FORTUNE and Time Inc. are not affiliated with, and do not endorse products or services of, Atlantic Health System.

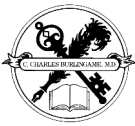

## Call for Nominations

The Institute of Living/Hartford Hospital is pleased to announce that nominations are now being accepted for the 2016 C. Charles Burlingame Award. This award, honoring an outstanding leader in psychiatric education, research or administration, is made in the memory of Dr. Burlingame, psychiatrist-in-chief from 1931 to 1950.

We invite you to nominate a person who has significantly advanced the field of psychiatry. The nomination must include a current curriculum vitae and two letters of support describing the candidate's achievements.

The Burlingame Award which will be presented at The Institute in the fall of 2016 includes a commemorative certificate and a \$2500 honorarium.

The Institute of Living is a comprehensive behavioral health system for the evaluation and treatment of psychiatric and addiction disorders. We offer a full continuum of services to patients and remain committed to the highest standards of clinical care, research and education.

### Past Recipients

|                                      |                                       |
|--------------------------------------|---------------------------------------|
| 1988 Robert Kellner, M.D., Ph.D.     | 2002 Charles B. Nemeroff, M.D., Ph.D. |
| 1989 William T. Carpenter, Jr., M.D. | 2003 Dilip V. Jeste, M.D.             |
| 1990 Dennis P. Cantwell, M.D.        | 2004 David H. Barlow, Ph.D.           |
| 1991 George E. Vaillant, M.D.        | 2005 Herbert D. Kleber, M.D.          |
| 1992 A. John Rush, M.D.              | 2006 Daniel N. Stern, M.D.            |
| 1993 John C. Nemiah, M.D.            | 2007 Jerrold F. Rosenbaum, M.D.       |
| 1994 Maurice J. Martin, M.D.         | 2008 K. Ranga Rama Krishnan, M.D.     |
| 1995 Otto F. Kernberg, M.D.          | 2009 David J. Kupfer, M.D.            |
| 1996 Charles P. O'Brien, M.D., Ph.D. | 2010 Professor Sir Michael Rutter     |
| 1997 Glen Owen Gabbard, M.D.         | 2011 Jeffrey A. Lieberman, M.D.       |
| 1998 Lissy F. Jarvik, M.D., Ph.D.    | 2012 Judith L. Rapoport, M.D.         |
| 1999 Nancy C. Andreasen, M.D., Ph.D. | 2013 Nora D. Volkow, M.D.             |
| 2000 Lewis L. Judd, M.D.             | 2014 Daniel R. Weinberger, M.D.       |
| 2001 Paul S. Appelbaum, M.D.         | 2015 David A. Brent, M.D.             |

**Institute  
of Living**

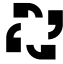

A Division of Hartford Hospital

Nominations should be sent no later than January 16, 2016 to:  
Harold I. Schwartz, M.D.  
HHC Regional VP, Behavioral Health  
Psychiatrist-in-Chief  
The Institute of Living/Hartford Hospital  
200 Retreat Avenue  
Hartford, CT 06106  
or e-mailed to Kathleen Day at  
Kathleen.Day@hhchealth.org

## Helping Kids in Crisis

### Managing Psychiatric Emergencies in Children and Adolescents

Edited by Fadi Haddad, M.D., and Ruth Gerson, M.D.

This is a practical, easy-to-use guide for clinicians working with child and adolescent psychiatric emergencies across a range of settings. This book provides clinical case examples with concrete tools for assessment, de-escalation, and diagnosis, to help clinicians quickly stabilize the crisis and determine when a trip to the emergency room is necessary.

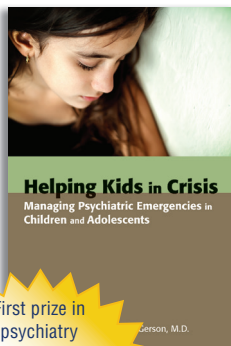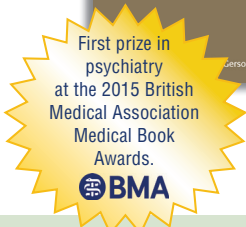

2015 • 227 pages • ISBN 978-1-58562-482-9 • Paperback • \$55.00 • Item #62482  
2015 • 227 pages • ISBN 978-1-58562-547-5 • eBook • \$55.00 • Item #62547

AMERICAN  
PSYCHIATRIC  
ASSOCIATION  
PUBLISHING

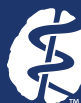

www.appi.org  
Email: appi@psych.org  
Phone: 1-800-368-5777

AH1545A

# Psychiatrists

## Minnesota

HealthPartners is one of the Upper Midwest's leading multispecialty physician groups. We have practice opportunities for talented, caring BC/BE psychiatrists in metropolitan Minneapolis/St. Paul and central Minnesota:

### Inpatient/Adult

- **Regions Hospital (St. Paul, MN):**  
Our state-of-the-art inpatient psychiatric facilities allow our team of psychiatrists, residents, therapists, social workers, NPs/PAs and nursing staff to provide exceptional care to adult psychiatric inpatients. Our Regions care model schedule is 7 days on/7 days off.

### Outpatient/Adult

- **Central Minnesota (Sartell/St. Cloud)**
- **Metropolitan Minneapolis/St. Paul**

These teams provide integrated outpatient mental health services in our primary care and outpatient specialty clinics located within a variety of urban, suburban and semi-rural communities. Full-time or part-time practices are available. No hospital call responsibilities.

In addition to competitive salaries, HealthPartners offers an excellent benefits package, including an employer-matched 401(k) and 457(b), generous personal time off, malpractice insurance coverage, etc.

Let us tell you more! Please forward your CV and cover letter to:  
**lori.m.fake@healthpartners.com**, apply online at **healthpartners.com/careers**, or call 800-472-4695 x1. EOE

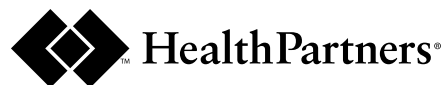

healthpartners.com

# We've got you covered.

For over 40 years, we have provided psychiatrists with exceptional protection and personalized service. We offer comprehensive insurance coverage and superior risk management support through an "A" rated carrier. In addition to superior protection, our clients receive individual attention, underwriting expertise, and, where approved by states, premium discounts.

## Endorsed by the American Psychiatric Association, our Professional Liability Program Provides:

- **Risk Management Hotline** 24/7 should an Emergency Arise
- **Insuring Company** rated "A" (Excellent) by A.M. Best
- **Telepsychiatry, ECT coverage & Forensic Psychiatric Services** are included
- **Many discounts, including Claims-Free, New Business & No Surcharge for claims** (subject to State Approval)
- **Interest-free quarterly Payments/Credit Cards Accepted**

Visit us at [apamalpractice.com](http://apamalpractice.com) or call **877.740.1777** to learn more.

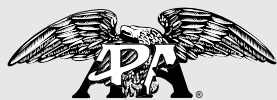

**American Professional Agency, Inc.**

LEADERS IN PSYCHIATRIC MEDICAL LIABILITY INSURANCE
