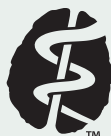

# The American Journal of Psychiatry

Official Journal of the American Psychiatric Association

## Officers 2015–2016

### President

Renée L. Binder, M.D.

### President-Elect

Maria A. Oquendo, M.D.

### Treasurer

Frank W. Brown, M.D.

### Secretary

Altha J. Stewart, M.D.

### Assembly

#### Speaker

Glenn A. Martin, M.D.

#### Speaker-Elect

Daniel J. Anzia, M.D.

#### Recorder

Theresa Miskimen, M.D.

### Office of the CEO and Medical Director

#### CEO and Medical Director

Saul Levin, M.D., M.P.A.

### Board of Trustees

Jeffrey Akaka, M.D.

Lama Bazzi, M.D.

R. Scott Benson, M.D.

Ronald M. Burd, M.D.

Stella Cai, M.D.

Brian Crowley, M.D.

Anita S. Everett, M.D.

Jeffrey L. Geller, M.D., M.P.H.

Dilip V. Jeste, M.D.

Jeffrey A. Lieberman, M.D.

Vivian B. Pender, M.D.

Gail E. Robinson, M.D.

Ravi N. Shah, M.D.

Paul Summergrad, M.D.

Melinda Young, M.D.

## Editorial Board

### Editor

Robert Freedman, M.D.

### Deputy Editors

David A. Lewis, M.D.

Robert Michels, M.D.

Daniel S. Pine, M.D.

A. John Rush, M.D.

Susan K. Schultz, M.D.

Carol A. Tamminga, M.D.

### Associate Editors

Alan Brown, M.D., M.P.H.

Tyrone Cannon, Ph.D.

Benjamin G. Druss, M.D., M.P.H.

Graham J. Emslie, M.D.

Daniel C. Javitt, M.D.

Bankole Johnson, M.D.

Ellen Leibenluft, M.D.

Joan L. Luby, M.D.

Constantine G. Lyketsos, M.D., M.H.S.

Helen S. Mayberg, M.D., F.R.C.P.C.

Barbara Milrod, M.D.

Terrie E. Moffitt, Ph.D.

Anita Thapar, M.B.B.Ch., F.R.C.Psych.,

Ph.D., F.Med.Sci.

Mauricio Tohen, M.D., Dr.PH., M.B.A.

Eduard Vieta, M.D., Ph.D.

Katherine L. Wisner, M.D., M.S.

Xin Yu, M.D.

### Editor Emerita

Nancy C. Andreasen, M.D., Ph.D.

### Former Editors

Amariah Brigham, M.D., 1844–1849

T. Romeyn Beck, M.D., 1849–1854

John P. Gray, M.D., 1854–1886

G. Alder Blumer, M.D., 1886–1894

Richard Dewey, M.D., 1894–1897

Henry M. Hurd, M.D., 1897–1904

Edward N. Brush, M.D., 1904–1931

Clarence B. Farrar, M.D., 1931–1965

Francis J. Braceland, M.D., 1965–1978

John C. Nemiah, M.D., 1978–1993

### Editorial Staff

#### Executive Editor

Michael D. Roy

#### Senior Editors

John J. Guardiano, Ph.D.

Jane Weaver

#### Production Manager

Susan Westrate

#### Assistant Editor

Angela Moore

#### Online Content Manager

Michael Pogachar

#### Editorial Support Services Manager

Heidi Koch

#### Editorial Assistant

Linda LaCour

#### Editorial Assistant/ Permissions Coordinator

Elizabeth Stern

#### Assistants to the Editors

Lois Lilienthal

Laura English

Rachel Hogg

Russell A. Scholl

### Publisher

Rebecca D. Rinehart

# The *Residents'* JOURNAL

## The American Journal of **Psychiatry** Residents' Journal

November 2015

Volume 10

Issue 11

### Inside

- 2 **Monitoring the Meeting: Resident Takeaways From the 2015 APA Annual Meeting**  
I. How Extended Combat Improved Our Ability to Effectively Treat Veterans  
Amit Mistry, M.D.  
II. ADHD in Adults: From Clinical Science to Clinical Practice  
Crispa J. Aeschbach Jachmann, M.D.  
III. The Evaluation and Treatment of Behavioral Emergencies  
Crispa J. Aeschbach Jachmann, M.D., and Kashmiria Rustomji, M.D.  
IV. Melatonin and Light Treatment of Seasonal Affective Disorder, Sleep, and Other Body-Clock Disorders  
Elizabeth Tiffany, M.D.
- 5 **Opioid Prescribing and Iatrogenic Addiction**  
Walter S. Mathis, M.D.
- 8 **Sexual Sadism Disorder in Forensic Populations**  
R. Scott Johnson, M.D., J.D., L.L.M., and Matthew R. Ayers, D.O.
- 11 **Treatment-Emergent Mania After Initiation of St. John's Wort**  
Shayna Carp, M.D., and Matisyahu Shulman, M.D.
- 13 **Fifty Shrinks**  
Reviewed by Amir Adam Tarsha, M.S.
- 14 **Residents' Resources**

### IN THIS ISSUE

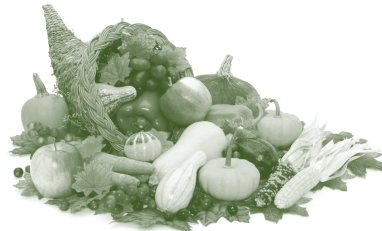

This issue of the *Residents' Journal* begins with synopses from the 2015 APA Annual Meeting in Toronto, written by resident-fellow monitors. Amit Mistry, M.D., monitored the session on how extended combat improved our ability to effectively treat veterans; Crispa J. Aeschbach Jachmann, M.D., monitored the session on attention deficit hyperactivity disorder in adults; Crispa J. Aeschbach Jachmann, M.D., and Kashmiria Rustomji, M.D., co-monitored a session on the evaluation and treatment of behavioral emergencies; and Elizabeth Tiffany, M.D., monitored a session on melatonin and light treatment in body-clock disorders. A review article by Walter S. Mathis, M.D., examines opioid prescribing and iatrogenic addiction. Another article by R. Scott Johnson, M.D., J.D., L.L.M., and Matthew R. Ayers, D.O., discusses the diagnosis of sexual sadism disorder in forensic populations. A case report by Shayna Carp, M.D., and Matisyahu Shulman, M.D., describes a first manic episode in a young male patient after initiation of St. John's wort. Lastly, Amir Adam Tarsha, M.S., presents a review of the book *Fifty Shrinks*.

**Editor-in-Chief**  
Rajiv Radhakrishnan, M.B.B.S., M.D.  
**Senior Deputy Editor**  
Katherine Pier, M.D.  
**Deputy Editor**  
Hun Millard, M.D., M.A.

**Associate Editors**  
Rafik Sidaros, M.B.B.Ch.  
Janet Charoensook, M.D.

**Staff Editor**  
Angela Moore

**Editors Emeriti**  
Sarah B. Johnson, M.D.  
Molly McVey, M.D.  
Joseph M. Cerimele, M.D.  
Sarah M. Fayad, M.D.  
Monifa Seawell, M.D.  
Misty Richards, M.D., M.S.

**Editor-in-Chief**  
Rajiv Radhakrishnan, M.B.B.S., M.D.

**Senior Deputy Editor**  
Katherine Pier, M.D.

**Deputy Editor**  
Hun Millard, M.D., M.A.

**Associate Editors**  
Rafik Sidaros, M.B.B.Ch.  
Janet Charoensook, M.D.

*The Residents' Journal* accepts manuscripts authored by medical students, resident physicians, and fellows. To submit your paper, please visit the manuscript submission site at [mc.manuscriptcentral.com/appi-ajp](http://mc.manuscriptcentral.com/appi-ajp) and either create an account or use your existing account. For manuscript type, select "Residents." Then follow the instructions to upload your manuscript. Residents who are interested in participating as Guest Section Editors should e-mail *The Residents' Journal* Editor-in-Chief Rajiv Radhakrishnan at [rajiv.radhakrishnan@yale.edu](mailto:rajiv.radhakrishnan@yale.edu).

*The Residents' Journal* is sent free-of-charge to all psychiatry residents. Anyone interested in being included on the distribution list should contact Angela Moore, *The Residents' Journal* staff editor at [ajp@psych.org](mailto:ajp@psych.org) with "Subscribe to Residents' Journal" in the subject line.

To access the complete *Residents' Journal* archives, visit [ajp.psychiatryonline.org/residents\\_journal](http://ajp.psychiatryonline.org/residents_journal)

# There's So Much More to AJP Than Meets the Page!

Visit *The American Journal of Psychiatry's* website on PsychiatryOnline for the following features!

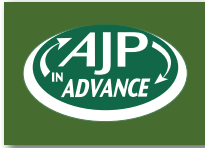

## AJP in Advance

The very latest research advances!

At **AJP in Advance**, you can discover the following before their appearance in print:

### Finding the Elusive Psychiatric “Lesion” With 21st-Century Neuroanatomy: A Note of Caution

MRI data on brain differences between psychiatric patients and control subjects are highly sensitive to numerous characteristics possibly associated with the psychiatric conditions. Changes in methods and reporting are first steps in acknowledging these confounders.

### Association Between ADHD and Obesity: A Systematic Review and Meta-Analysis

ADHD is consistently associated with obesity or excess weight, in both children and adults. Underlying mechanisms are not known, but the association is not found in patients receiving medication for ADHD.

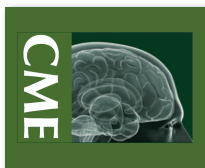

## AJP CME

Three articles in this issue form the basis of a short course with questions that can be answered for up to 1 *AMA PRA Category 1 Credit™* each by visiting <http://psychiatryonline.org/cme> and clicking on the “**American Journal of Psychiatry**” tab. CME credit is issued only **online**, and a paid subscription to AJP CME course program is required. This month's courses appear on pages 1271–1274.

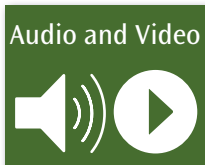

## Have You Heard?

With AJP Audio you can listen to highlights of this issue. This month, Deputy Editor Susan K. Schultz, M.D., discusses management of alcohol use disorder in patients requiring liver transplant, adding ziprasidone to escitalopram for treatment of depression, attention training for reducing PTSD symptoms, extended-release guanfacine for hyperactivity in autism spectrum disorder, a program for preventing anxiety disorders in offspring of anxious parents, and pregnancy complications following prenatal exposure to SSRIs or maternal psychiatric disorders.

Also, visit the online edition of this month's *Journal* to view a video of Deputy Editor Daniel S. Pine, M.D., presenting highlights from the issue.

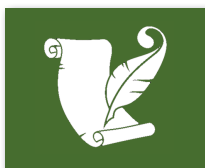

## Revisit the field's rich history!

### 50 years ago this month: “Television Evidence in Court”

Psychiatrist James H. Ryan and attorney Vito J. Cassan report on the legal precedent set when “a video tape recording of a diagnostic interview was presented for the first time in a court of law during a mental incompetency proceeding,” and they discuss some of the ramifications.

### 25 years ago this month: “The Déjà Vu Experience: Remembrance of Things Past?”

Drs. Herman N. Sno and Don H. Linszen note that “the déjà vu experience is a common phenomenon, occurring in pathological as well as nonpathological conditions. It has been defined as any subjectively inappropriate impression of familiarity of a present experience with an undefined past. [They] discuss the epidemiologic data, clinical features, and etiology of the phenomenon of déjà vu. They also review the different hypotheses on the psychopathogenesis of the déjà vu experience and introduce an explanation based on the hologram as a mnemonic model.”

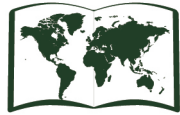

# SHARP

Shanghai Archives of Psychiatry · Since 1959

上 海 精 神 医 学

[WWW.SHANGHAIARCHIVESOFPSYCHIATRY.ORG](http://WWW.SHANGHAIARCHIVESOFPSYCHIATRY.ORG)

AUGUST 2015 • VOL. 27 • NO. 4

## IN THIS ISSUE

<http://dx.doi.org/10.11919/j.issn.1002-0829.215102>

## COMMENTARY

**Challenges to the uniqueness of psychotic experience in psychosis: insights on research methodology and intervention**

Linda CW LAM

doi: <http://dx.doi.org/10.11919/j.issn.1002-0829.215068>

## SYSTEMATIC REVIEW AND META-ANALYSIS

**Efficacy and safety of treating patients with refractory schizophrenia with antipsychotic medication and adjunctive electroconvulsive therapy: a systematic review and meta-analysis**

Wenzheng WANG, Chengcheng PU, Jiangling JIANG, Qinyi CAO, Jijun WANG, Min ZHAO, Chunbo LI

doi: <http://dx.doi.org/10.11919/j.issn.1002-0829.215093>

## ORIGINAL RESEARCH ARTICLES

**Single-blind, randomized controlled trial of effectiveness of Naikan therapy as an adjunctive treatment for schizophrenia over a one-year follow-up period**

JHong ZHANG, Chenhu LI, Liyu ZHAO, Guilai ZHAN

doi: <http://dx.doi.org/10.11919/j.issn.1002-0829.215055>

**Treatment of major depressive disorders with generic duloxetine and paroxetine: a multi-centered, double-blind, double-dummy, randomized controlled clinical trial**

Zhiyang WANG, Xiufeng XU, Qingrong TAN, Keqing LI, Cui MA, Shiping XIE, Chengge GAO, Gang WANG, Huafang LI

doi: <http://dx.doi.org/10.11919/j.issn.1002-0829.215064>

**Comparison of the effectiveness of duloxetine in depressed patients with and without a family history of affective disorders in first-degree relatives**

Shiliang WANG, Mincai QIAN, Hua ZHONG, Guohua SONG, Meijuan LU, Rui FENG, Lei ZHANG, Jianliang NI, Wei CHEN

doi: <http://dx.doi.org/10.11919/j.issn.1002-0829.215080>

## FORUM

**Comorbid bipolar disorder and obsessive compulsive disorder**

Daihui PENG, Kaida JIANG

doi: <http://dx.doi.org/10.11919/j.issn.1002-0829.215009>

**Obsessive compulsive symptoms in bipolar disorder patients: a comorbid disorder or a subtype of bipolar disorder?**

Shenxun SHI

doi: <http://dx.doi.org/10.11919/j.issn.1002-0829.215091>

## CASE REPORT

**Case report of comorbid schizophrenia and obsessive-compulsive disorder in a patient who was tube-fed for four years by family members because of his refusal to eat**

Ankur SACHDEVA, Mina CHANDRA, Ankit SAXENA, RP BENIWAL, Manish KANDPAL, Arvind KUMAR

doi: <http://dx.doi.org/10.11919/j.issn.1002-0829.215013>

## BIostatistics in Psychiatry (28)

**Introduction to longitudinal data analysis in psychiatric research**

Xian LIU

doi: <http://dx.doi.org/10.11919/j.issn.1002-0829.215089>
