DECEMBER 2015 | VOLUME 172 | NUMBER 12

# The American Journal of Psychiatry

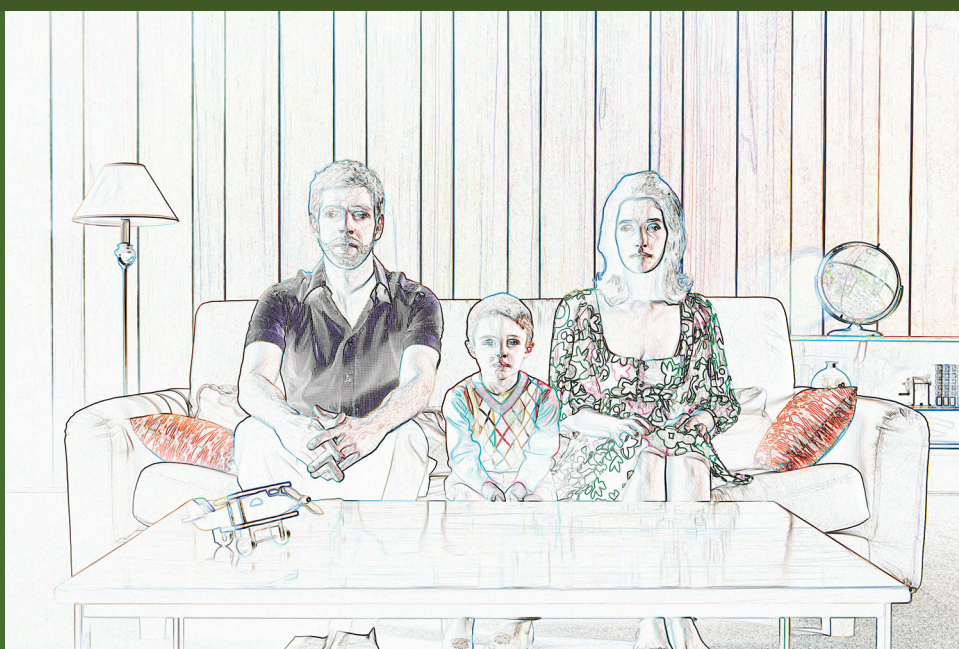

Preventing Onset of Anxiety Disorders in  
Offspring of Anxious Parents

Extended-Release Guanfacine for Hyperactivity in  
Children with Autism Spectrum Disorder

The Brain's Response to Reward Anticipation and  
Depression in Adolescence

2015 in Review

AMERICAN  
PSYCHIATRIC  
ASSOCIATION

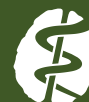

[ajp.psychiatryonline.org](http://ajp.psychiatryonline.org)
